# Supplementary material
Source: PubMed Central journal article supplement (PMC3103311)
Supplement: supp_M110.197707_jbc.M110.197707-1.pdf [file supp_M110.197707_jbc.M110.197707-1.pdf]

# Sup 1

c-CIS IP GST IB

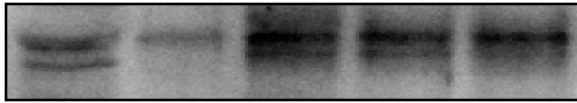

+ - C PC UO

cCBL IP GST IB

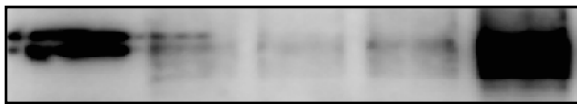

+ - C PC UO

Supplemental data 1. Immunoprecipitation of CIS and Cbl with Bim following preconditioning ischemia. Neuronal cells were subjected to 30 min OGD preconditioning ischemia and then recovered in the presence of U0126 (10 $\mu$ M) for 1 h. Lysates were incubated with GST-Bim and then subjected to cCBL IP or CIS IP. precipitated proteins were immunoblotted with a GST specific antibody. Data shown are representative blots (n=2).
